# Supplementary material for: Transcriptomic and epigenetic responses to short-term nutrient-exercise stress in humans
Source: PubMed Central journal article supplement (PMC5680174; doi:10.1038/s41598-017-15420-7), 2017-11-09
Supplement: 41598_2017_15420_MOESM1_ESM.pdf [file 41598_2017_15420_MOESM1_ESM.pdf]

1 **Supplementary information**

2 Transcriptomic and epigenetic responses to short-term nutrient-exercise stress in humans

3

4 Laker, R.C.<sup>1</sup>, Garde, C.<sup>1</sup>, Camera, D.M.<sup>2</sup>, Smiles, W.J.<sup>2</sup>, Zierath, J.R.<sup>1,3</sup>, Hawley, J.A.<sup>2,4</sup> and Barrès, R.<sup>1,\*</sup>

5

6 <sup>1</sup>Novo Nordisk Foundation Center for Basic Metabolic Research, University of Copenhagen, Denmark;

7 <sup>2</sup>Mary MacKillop Institute for Health Research, Centre for Exercise and Nutrition, Australian Catholic

8 University, Melbourne, Australia; <sup>3</sup>Integrative Physiology, Department of Molecular Medicine and Surgery

9 and Department of Physiology and Pharmacology, Karolinska Institutet, Stockholm, Sweden; <sup>4</sup>Research

10 Institute for Sport and Exercise Sciences, Liverpool John Moores University, Liverpool, United Kingdom

11

12 \*Corresponding author: Romain Barrès, University of Copenhagen, Blegdamsvej 3B,

13 2200 Copenhagen, Denmark, Phone +45 35 33 71 10, [barres@sund.ku.dk](mailto:barres@sund.ku.dk)

14 **Online Supplemental Material**

15 **Table S1. Differentially expressed genes and DMRs.** Tab 1: RNA-seq Ex-HFD (FDR<0.1). Tab 2: RNA-  
16 seq Sed-HFD (FDR<0.1). Tab 3: RRBS Ex-HFD (FDR<0.1). Tab 4: RRBS Sed-HFD (FDR<0.1).

17 **Table S2. RNA-seq GO analyses.** Tab 1: Biological process upregulated genes. Tab 2: Biological process  
18 downregulated genes. Tab 3: Molecular function upregulated genes. Tab 4: Molecular function  
19 downregulated genes. Tab 5: Cellular compartment upregulated genes. Tab 6: Cellular compartment  
20 downregulated genes.

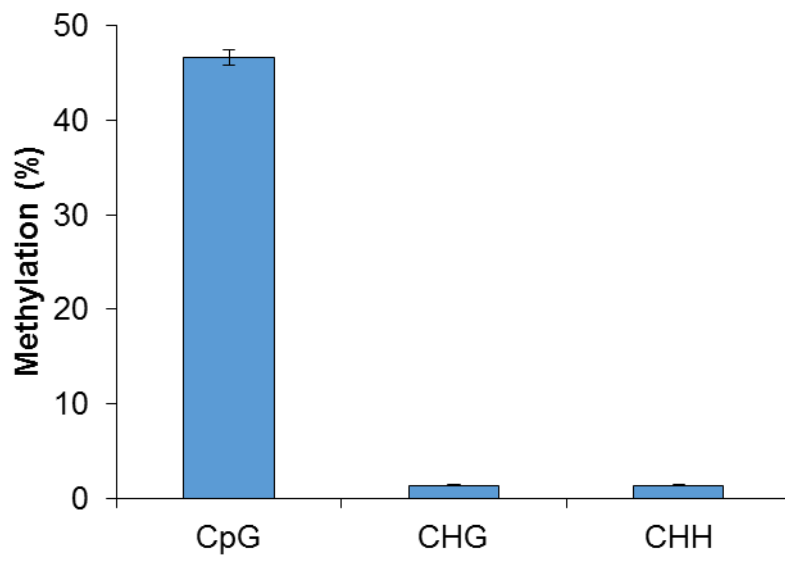

21

22 **Figure S1. Percent methylation of CpG, CHG and CHH sites within our RRBS analysis.** Non-CpG

23 methylation of CHG and CHH sites averaged 1.41% and 1.39%, respectively.

## Sample-wise CpG methylation at sites with known methylation

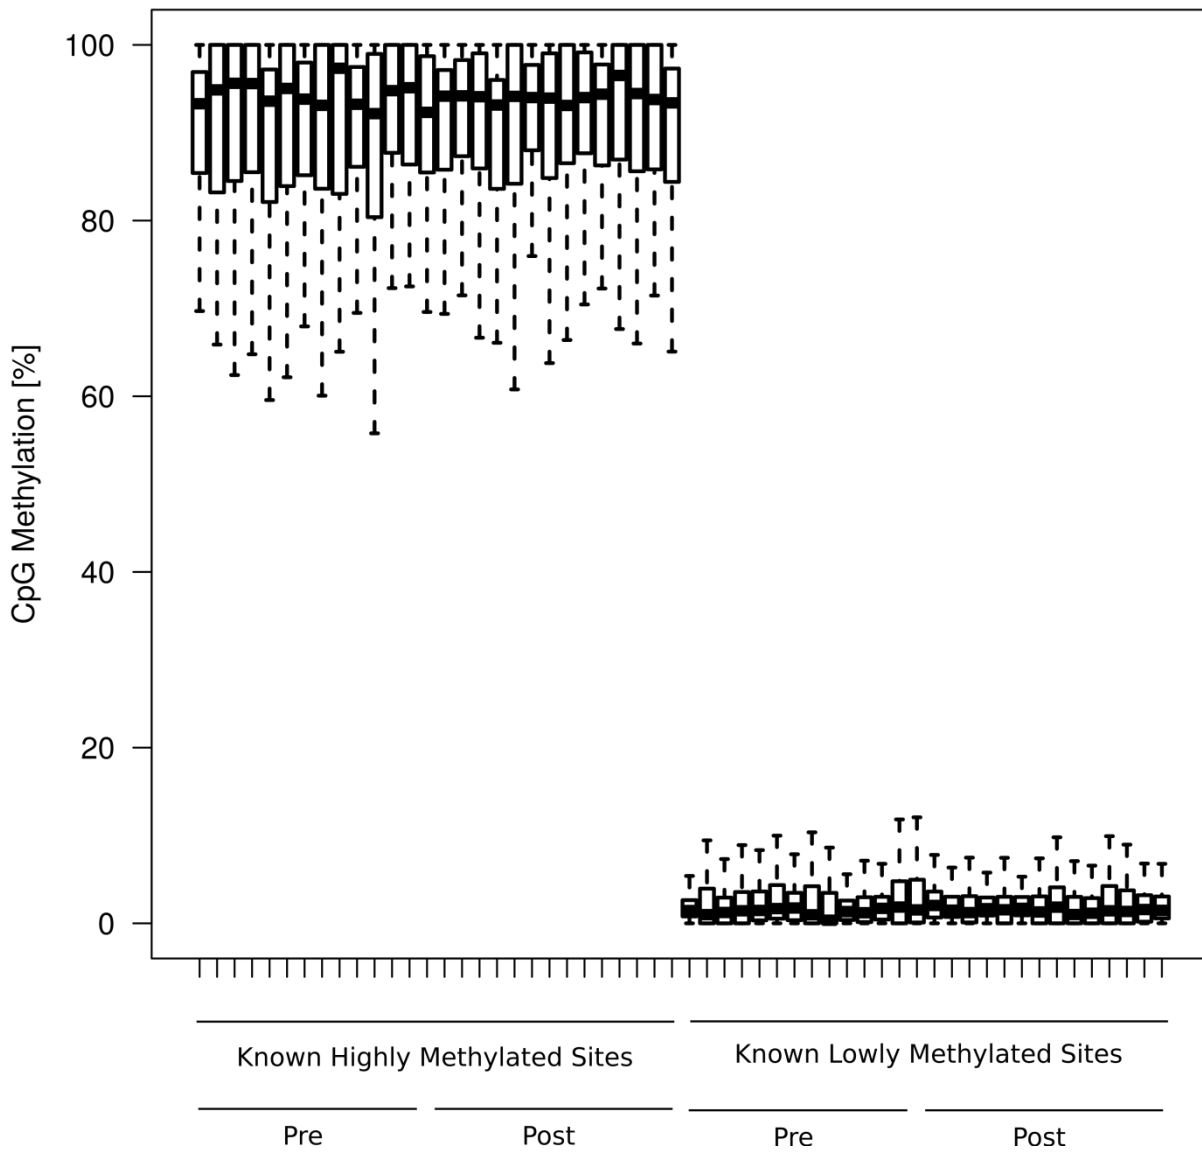

24

25

26 **Figure S2. Percent methylation of CpG sites known to have either very high or very low methylation**

27 **state in adult human skeletal muscle as well as across 50 different cell types.** For each sample in our

28 analysis, the methylation level was consistent with the expected methylation level for each known CpG site.

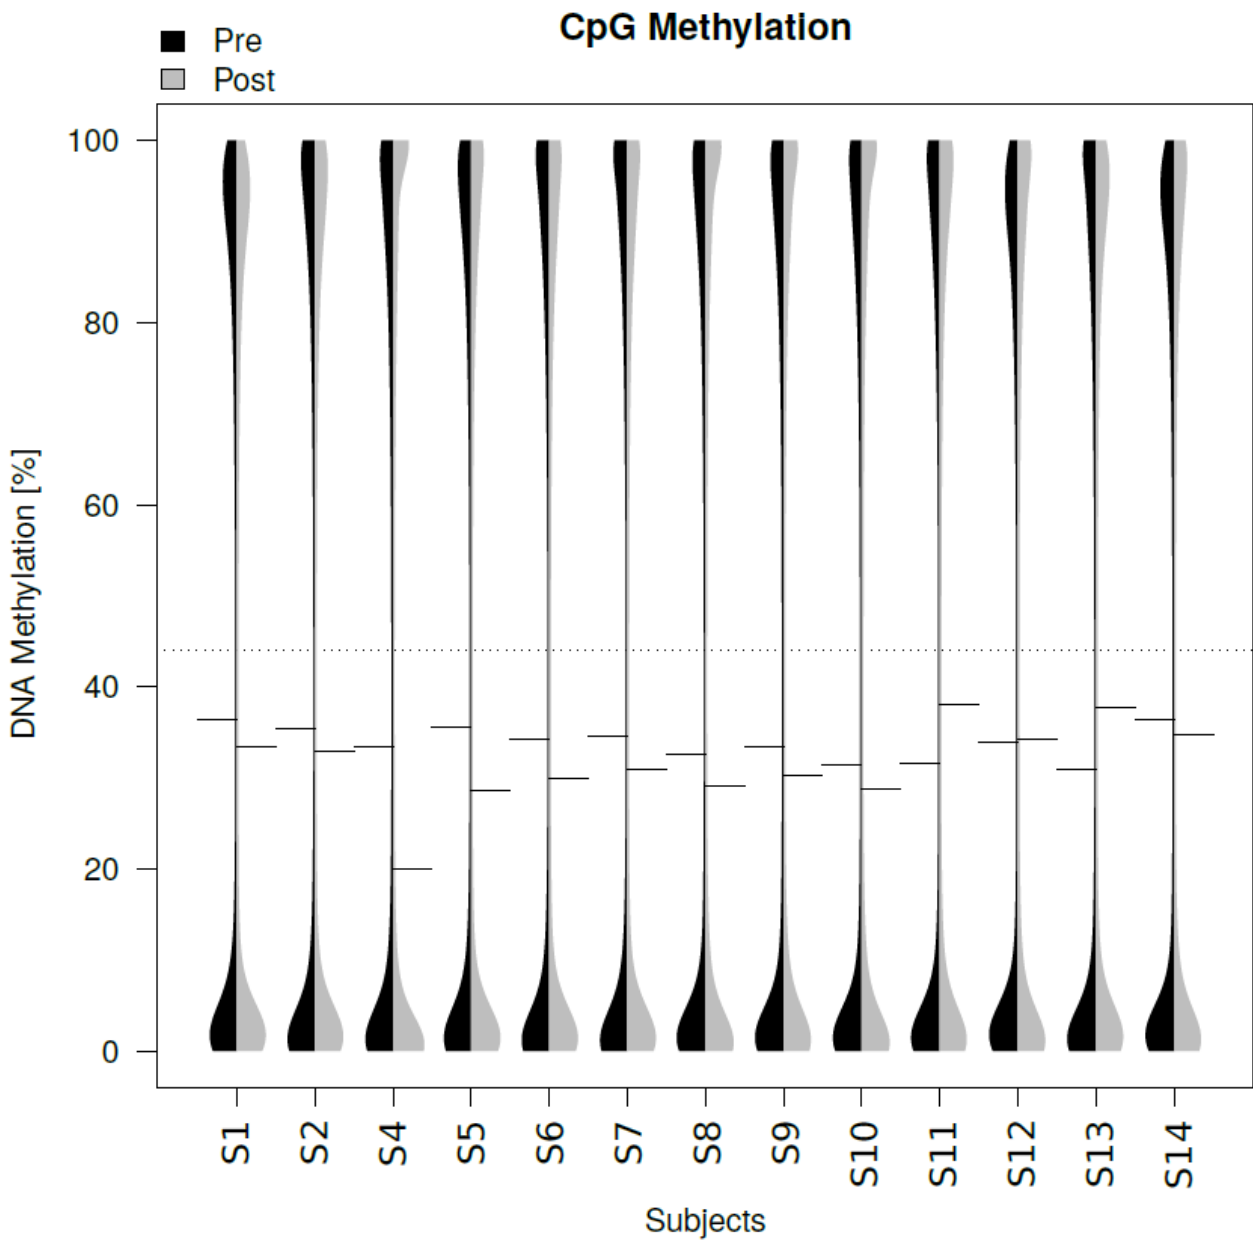

29

30 **Figure S3. Distribution of % methylation of all CpG sites explored in our differential analysis for each**  
 31 **participant.** The CpG methylation had a bimodal distribution with the majority of CpG sites between 0-15%  
 32 and 85-100% methylated, suggestive of successful bisulfite conversion. Average level of methylation for  
 33 each sample is represented by the horizontal line.

34

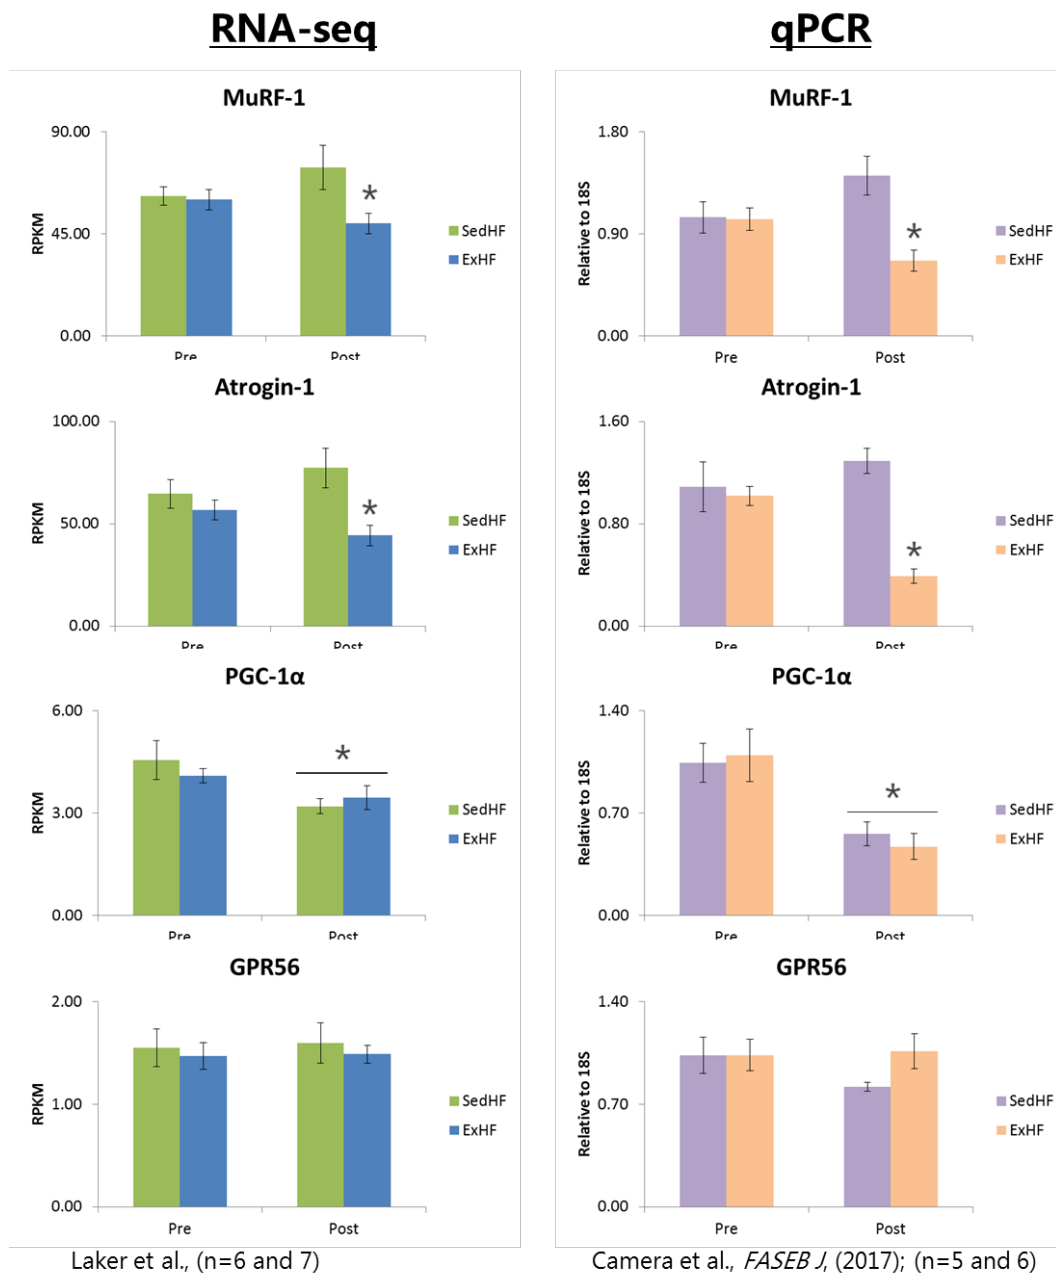

35

36 **Figure S4. Validation of RNAseq data using real-time qPCR.** Raw data in reads per kilobase million  
 37 (RPKM) was extracted from the RNAseq (Left) for selected genes, which had been previously analysed by  
 38 real-time qPCR (right). The qPCR analysis was performed for a subset of samples from the same experiment  
 39 (outlined in Fig. 1) and published elsewhere. We compared the expression patterns between the 2 analyses  
 40 and found them to be consistent. The genes analyzed included (A) MuRF-1, (B) Atrogin-1, (C) PGC-1 $\alpha$  and  
 41 (D) GPR56.
